# Supplementary material for: Antigenic responses are hallmarks of fibrotic interstitial lung diseases independent of underlying etiologies
Source: PubMed Central journal article supplement — medRxiv. 2023 May 11:2023.05.08.23289640. Preprint. [Version 1] doi: 10.1101/2023.05.08.23289640 (PMC10197719; doi:10.1101/2023.05.08.23289640), 2023-05-11
Supplement: media-1.pdf [file media-1.pdf]

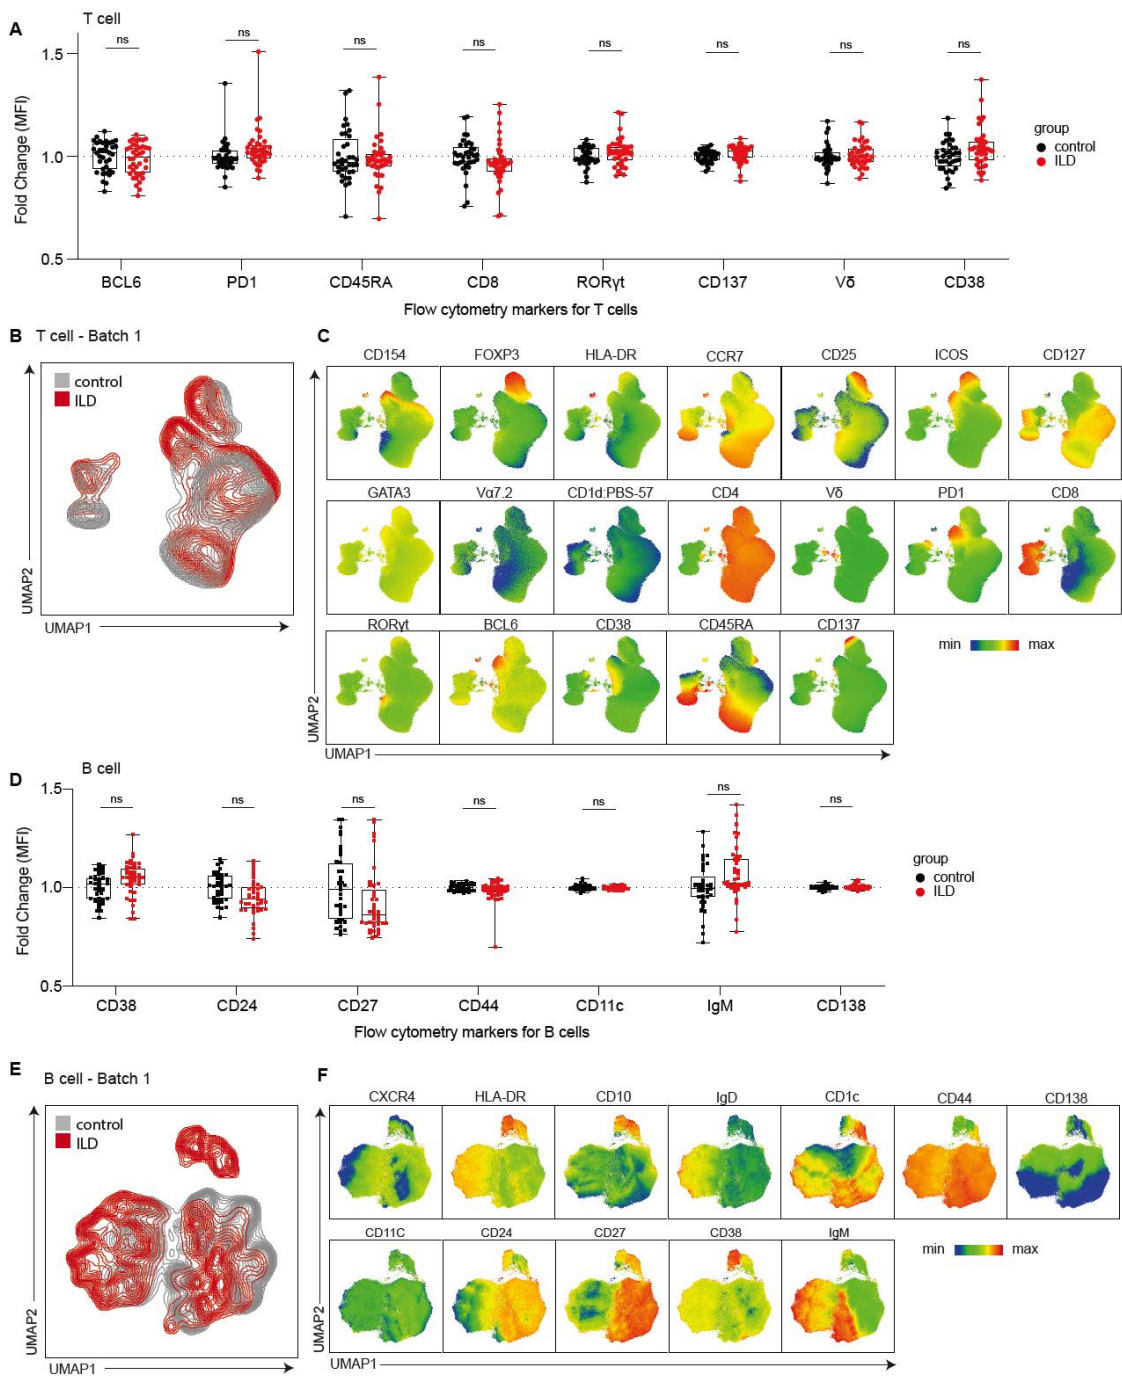

**Figure S1. T cell and B cell landscapes in LLNs from ILD patients compared with matched controls.** (A) Box plots comparing the median fluorescence intensity of individual T cell markers based on all samples in batches 1-3. Fold change was calculated relative to the mean values of control samples, separately for each batch. (B) Representative UMAP of T cells. Each group (control vs ILD) contains 130,000 T cells concatenated from 13 individuals (10,000 cells per individual) in batch 1. (C) Fluorescence intensity of each T cell parameter overlaid on the UMAP plot. (D) Box plots comparing the median fluorescence intensity of individual B cell markers based on all samples in batches 1-3. Fold change was calculated relative to the mean values of control samples, separately for each batch. (E) Representative UMAP of B cells. Each group (control vs ILD) contains 130,000 B cells concatenated from 13 individuals (10,000 cells per individual) in batch 1. (F) Fluorescence intensity of each B cell parameter overlaid on the UMAP plot.

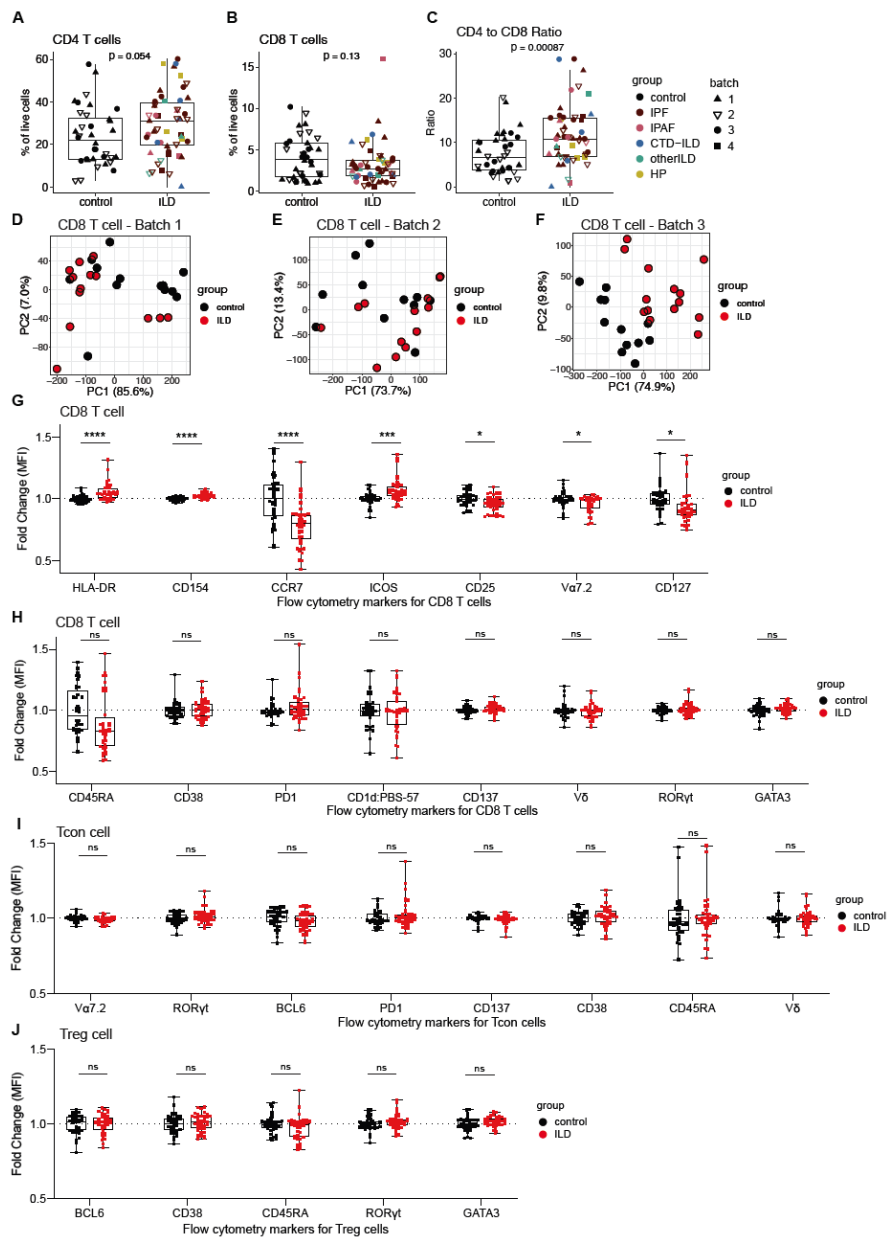

**Figure S2. T cell subpopulations in LLNs from ILD patients compared with matched controls. (A)** Comparison of CD4 T cell frequencies in control and ILD LLNs. **(B)** Comparison of CD8 T cell frequencies in control and ILD LLNs. **c.** Comparison of CD4 to CD8 T cell ratio in control and ILD LLNs. **(D-F)** PCA of CD8 T cells based on fluorescence intensities of 15 parameters: CD154, HLA-DR, CCR7, CD25, ICOS, CD127, GATA3,  $V\alpha 7.2$ , PBS-57 loaded CD1d tetramer,  $V\delta$ , PD1, ROR $\gamma$ t, CD38, CD45RA and CD137. An analysis was run with 1,600 cells, 669 cells, and 1,100 cells for batch 1, batch 2, and batch 3, respectively. **(G-H)** Box plots comparing the median fluorescence intensity of individual CD8 T cell markers based on all samples in batches 1-3. **i.** Box plots comparing the median fluorescence intensity of individual Tcon markers based on all samples in batches 1-3. **j.** Box plots comparing the median fluorescence intensity of individual Treg markers based on all samples in batches 1-3. For all MFI comparisons, fold change was calculated relative to the mean values of control samples, separately for each batch. Parameters that are significantly associated with ILD based on a likelihood-ratio test on each logistic regression coefficient are shown. P-values were adjusted by Benjamini-Hochberg correction.  $P < 0.05$  (\*),  $P < 0.01$  (\*\*),  $P < 0.001$  (\*\*\*),  $P < 0.0001$  (\*\*\*\*).

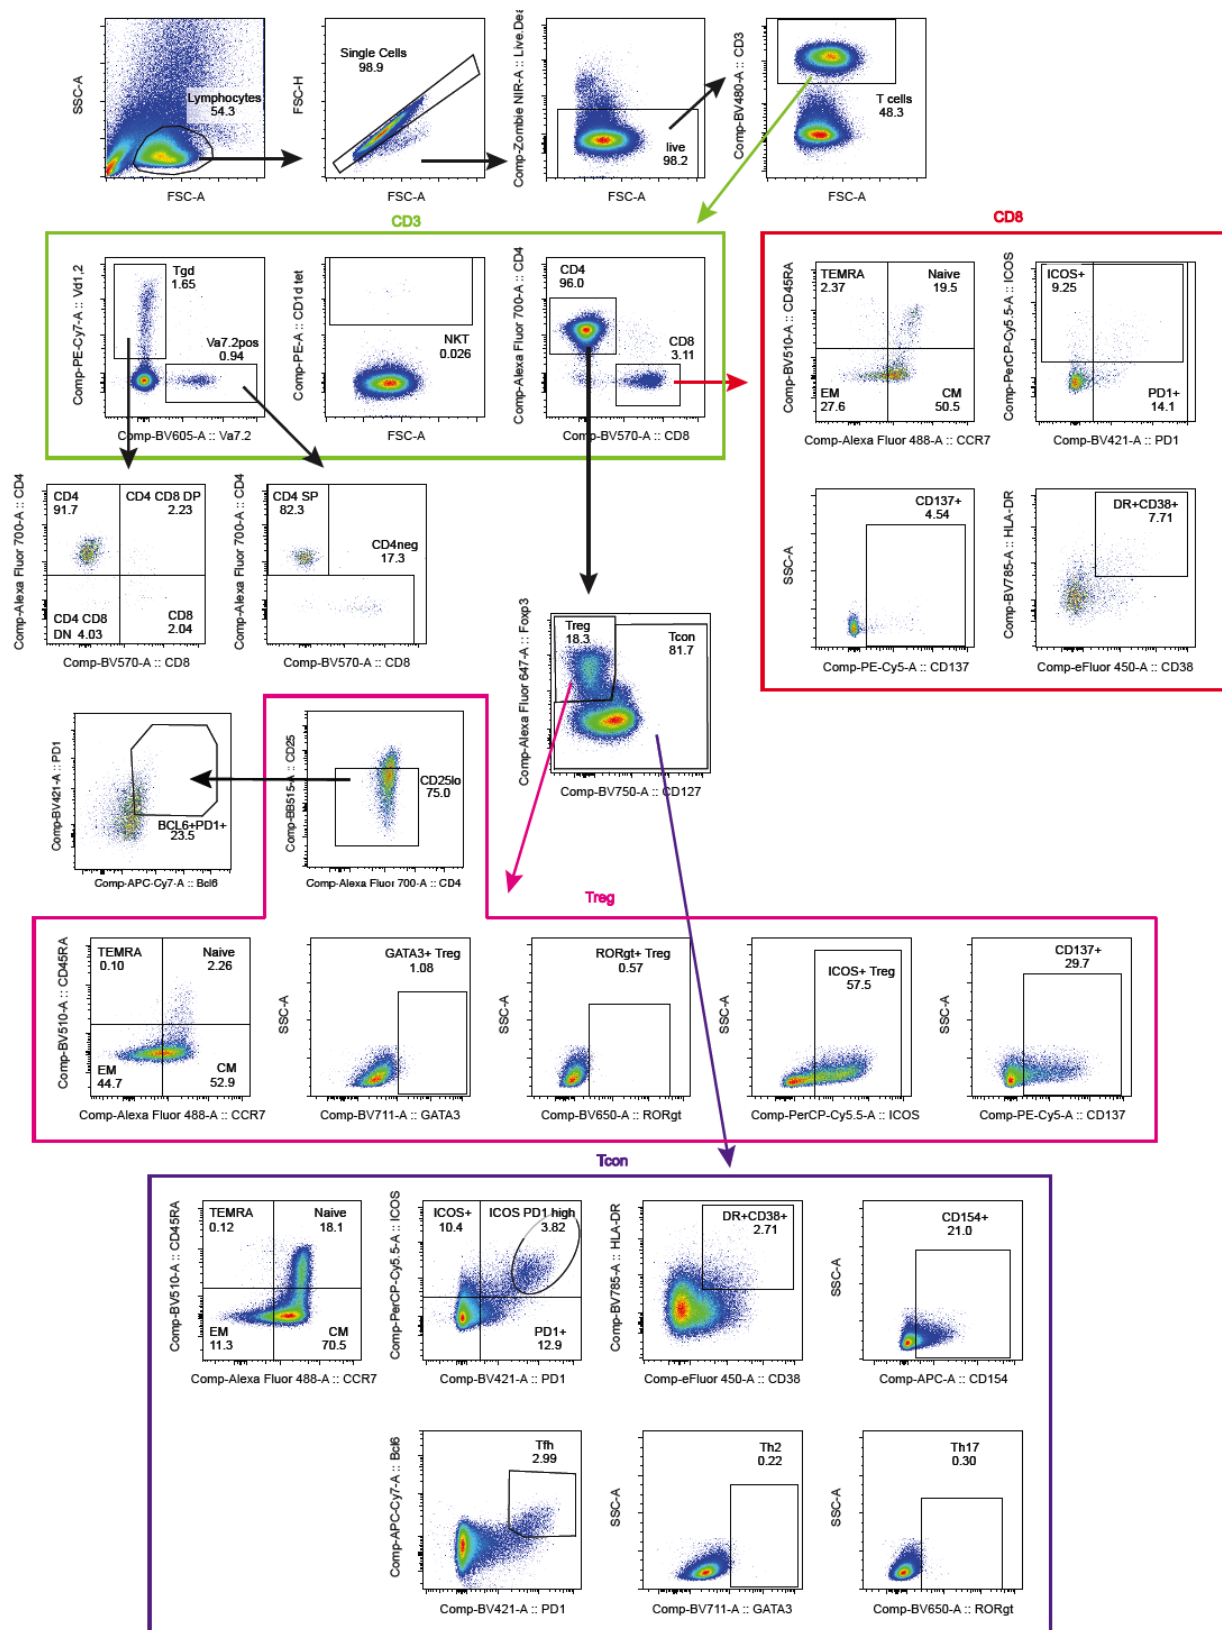

Figure S3. Gating strategies for T cell populations.

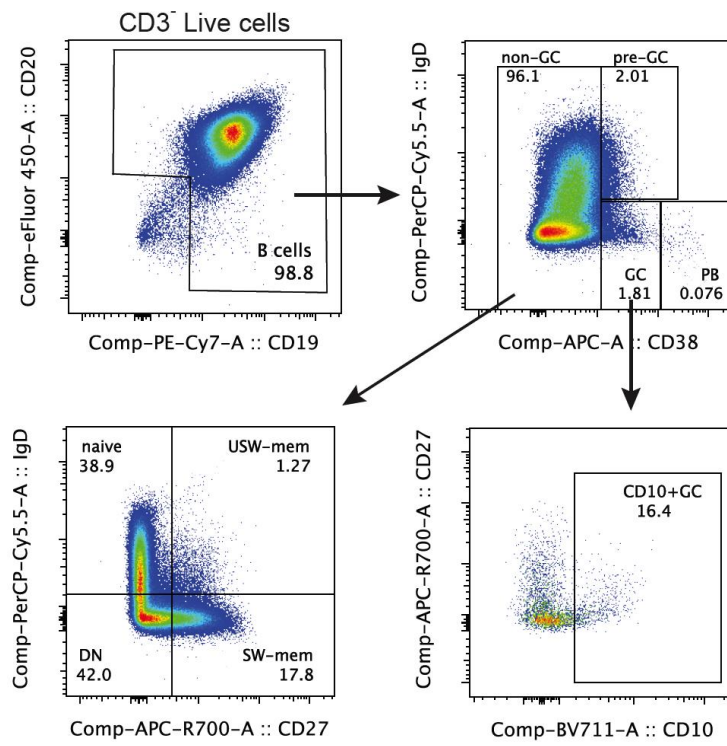

**Figure S4. Gating strategies for B cell populations.**

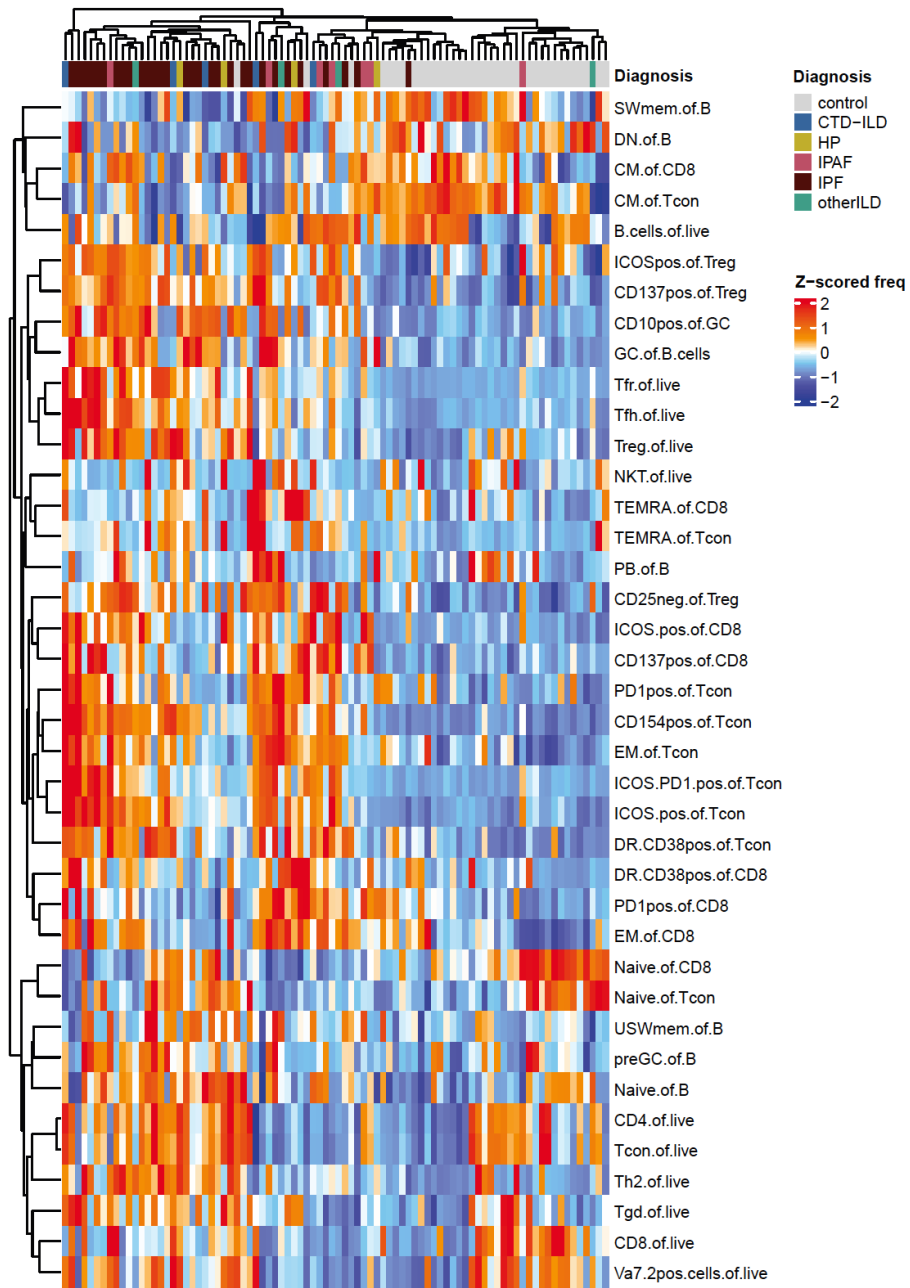

Figure S5. **Heatmap with unsupervised clustering based on immune cell abundance.** Heatmap visualization of a hierarchical clustering of control and ILD individuals based on z-scored frequencies of 39 immune cell populations.

```

Mixed-effects ML regression
Group variable: sampleID

Number of obs   =   274
Number of groups =   31

Obs per group:
    min =   2
    avg =  8.8
    max =  37

Wald chi2(3)   =   54.83
Prob > chi2    =   0.0000

Log likelihood = -972.3637

```

| fv         | Coef.     | Std. Err. | z     | P> z  | [95% Conf. Interval] |           |
|------------|-----------|-----------|-------|-------|----------------------|-----------|
| year       | -1.453615 | .3754472  | -3.87 | 0.000 | -2.189479            | -.7177524 |
| GCB_status | 6.396411  | 5.580307  | 1.15  | 0.252 | -4.54079             | 17.33361  |
| GCB*year   | -1.99864  | .6660458  | -3.00 | 0.003 | -3.304066            | -.6932146 |
| _cons      | 55.72422  | 3.998668  | 13.94 | 0.000 | 47.88697             | 63.56146  |

| Random-effects Parameters | Estimate | Std. Err. | [95% Conf. Interval] |          |
|---------------------------|----------|-----------|----------------------|----------|
| mrn: Identity             |          |           |                      |          |
| var(_cons)                | 224.9574 | 59.48363  | 133.9751             | 377.7257 |
| var(Residual)             | 47.42213 | 4.303841  | 39.69441             | 56.65427 |

LR test vs. linear model: chibar2(01) = 340.84      Prob >= chibar2 = 0.0000

**Figure S6. Relationship between the lung function changes over time and GC B cell status in explanted LLNs.** Mixed-effects regression modeling with a random intercept was used to analyze changes in forced vital capacity (FVC) over time (year) by germinal center B cell status (GCB\_status) in explanted LLNs.

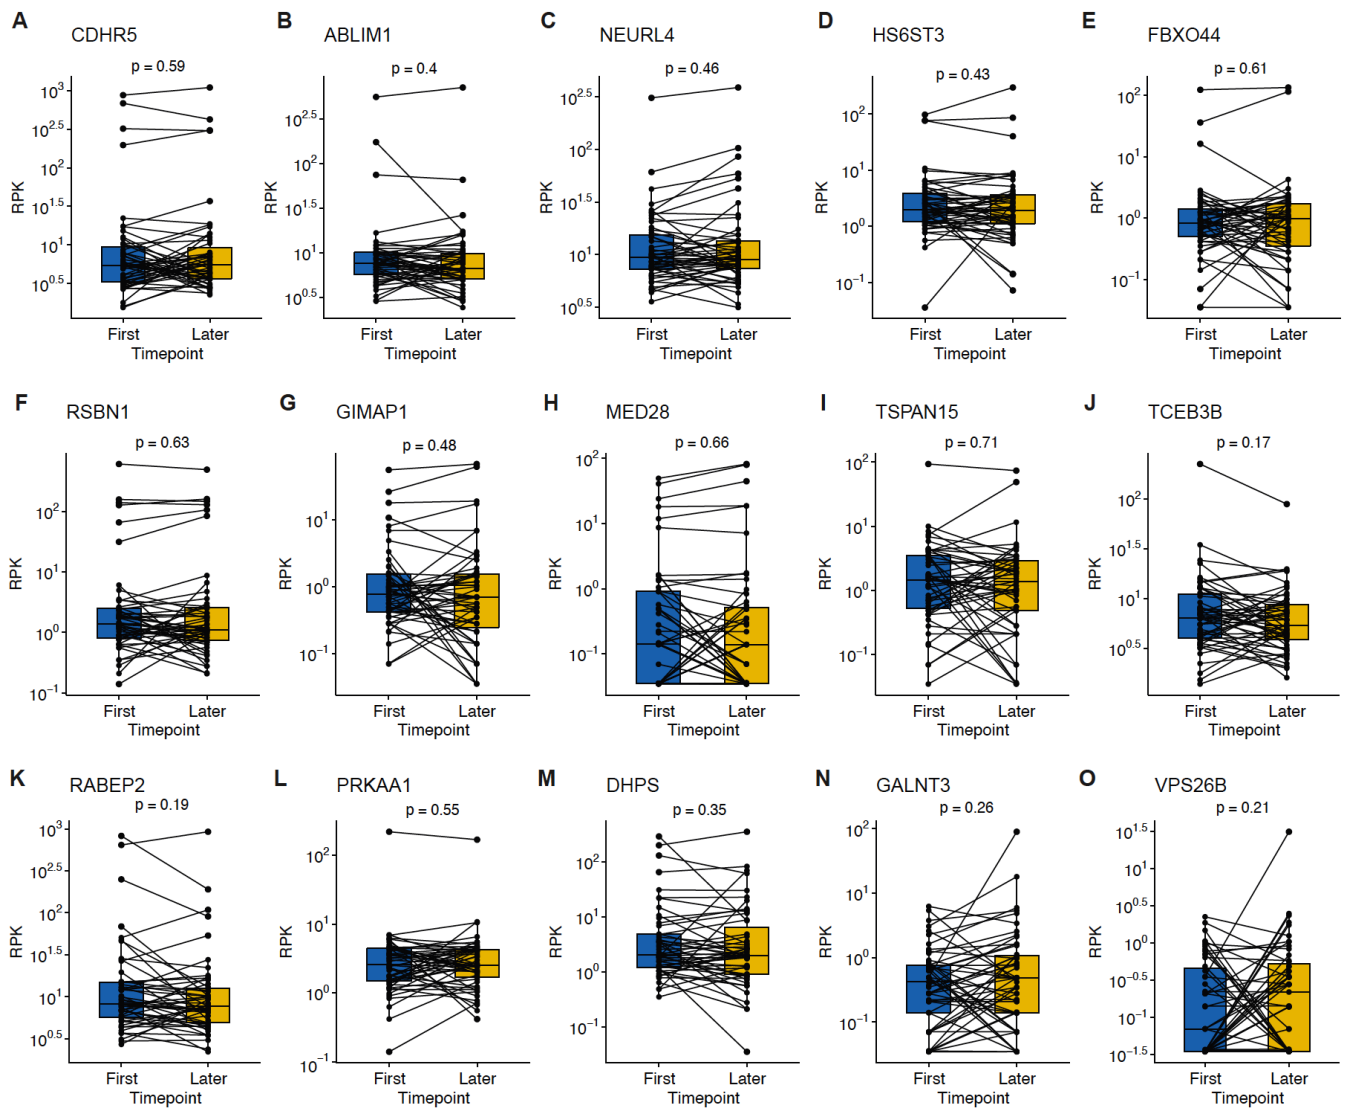

Figure S7. **Longitudinal analysis of autoantibody amounts in ILD plasma.** (A-O) Autoantibody signals based on PhIP-seq results (RPK: reads per 100k) were compared between longitudinally paired plasma samples from ILD patients (n=51). Intervals between the first and later time-points range between 98 to 2952 days. Paired Wilcoxon p-values are displayed for each of the 15 ILD antigens.

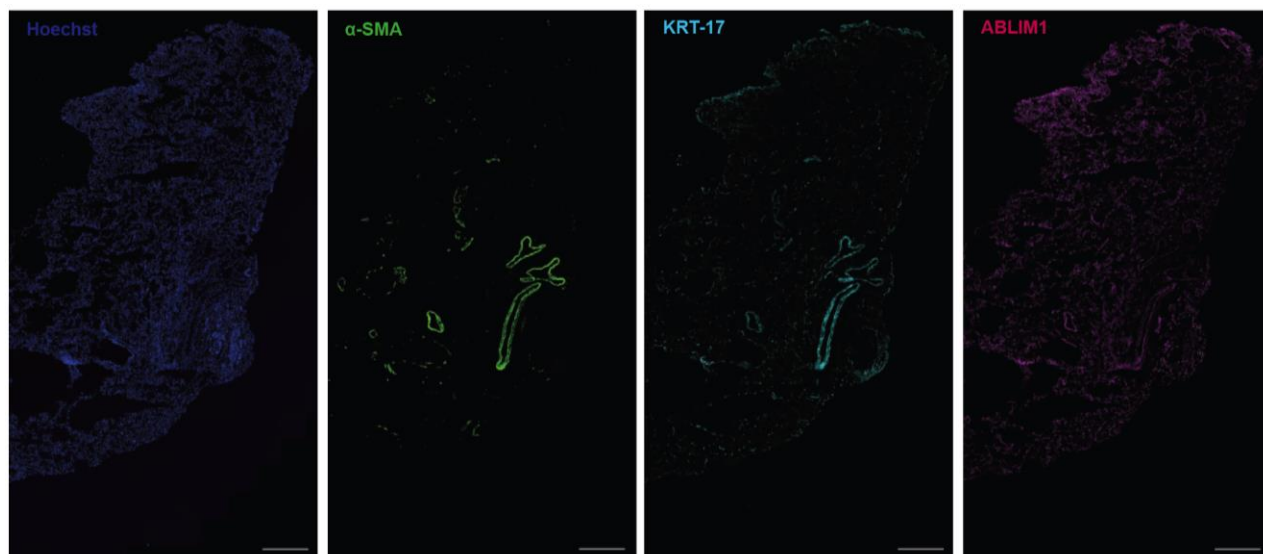

Figure S8. **Immunofluorescence analysis of ABLIM1 in control lungs.** Representative immunofluorescence staining of organ donor control lungs for Hoechst, alpha-smooth muscle actin ( $\alpha$ -SMA), cytokeratin 17 (KRT-17), and ABLIM1. Images were taken with a 40x objective, and the scale bar is 100um.



|               |  |     |                                                                                          |     |
|---------------|--|-----|------------------------------------------------------------------------------------------|-----|
| Isoform a     |  | 1   | MPAFLGLKCLGKLCSSSEKSKVTSSERTSARGSNRKRLIVEDRRVSGTSFTAHRRAITITHLLYLCPKDYCPRGRV             | 74  |
| Isoform j     |  |     | -----                                                                                    |     |
| Epitope (n=3) |  |     | MPAFLGLKCLGKLCSSSEKSKVTSSERTSARGSNRKRLIVEDRRVSGTSF-----                                  |     |
| Epitope (n=1) |  |     | -----ERTSARGSNRKRLIVEDRRVSGTSFTAHRRAITITHLLYLCPKDYCPRGR-                                 |     |
|               |  |     |                                                                                          |     |
| Isoform a     |  | 440 | QDVRDRMIHRSTSQGSINSPVYSRHSYPTTTSRSPQHFH-----                                             |     |
| Isoform j     |  | 124 | QDVRDRMIHRSTSQGSINSPVYSRHSYPTTTSRSPQHFH-----                                             |     |
| Epitope (n=1) |  |     | -DVRDRMIHRSTSQGSINSPVYSRHSYPTTTSRSPQHFHRPDQGGINIYRK---                                   |     |
|               |  |     |                                                                                          |     |
| Isoform a     |  |     | -----GNEPSSGRNSPLPYRPSRPLTPTYAQAPKHFHVPDQGGINIYRKPPPIYKQH                                | 531 |
| Isoform j     |  | 168 | SPGVQRLSYLRTSSLSPTHSDSRPNPPFRHHFIPHIKGNPSSGRNSPLPYRPSRPLTPTYAQAPKHFHVPDQGGINIYRKPPPIYKQH | 255 |
| Epitope (n=5) |  |     | -PGVQRLSYLRTSSLSPTHSDSRPNPPFRHHFIPHIKGNPSSGRNSPL-----                                    |     |
| Epitope (n=5) |  |     | -----PTHSDSRPNPPFRHHFIPHIKGNPSSGRNSPLPYRPSRPLTPTYAQA-----                                |     |
| Epitope (n=2) |  |     | -----PPFRHHFIPHIKGNPSSGRNSPLPYRPSRPLTPTYAQAPKHFHVPDQ-----                                |     |
| Epitope (n=1) |  |     | -----NSPLPYRPSRPLTPTYAQAPKHFHVPDQGGINIYRKPPPIYKQH                                        |     |
|               |  |     |                                                                                          |     |
| Isoform a     |  | 522 | YRKPPPIYKQH (---)RRSSGREEDDELLRRRQLQEEQLMKLNGLGQLLILKEEMEKESRERS                         | 632 |
| Isoform j     |  | 246 | YRKPPPIYKQHGPDMKRRSSGREEDDELLRRRQLQEEQLMKLNGLGQLLILKEEMEKESRERS                          | 309 |
| Epitope (n=2) |  |     | --KPPPIYKQHGPDMKRRSSGREEDDELLRRRQLQEEQLMKLNGLGQLL-----                                   |     |
| Epitope (n=1) |  |     | -----KRRSSGREEDDELLRRRQLQEEQLMKLNGLGQLLILKEEMEKESRERS-                                   |     |
|               |  |     |                                                                                          |     |
| Isoform a     |  | 675 | YNSYGDVSGGVRDYQTLPDGHMPAMRMDRGVSMFNMLEPKIFPYEMLMVTN                                      | 725 |
| Isoform j     |  | 352 | YNSYGDVSGGVRDYQTLPDGHMPAMRMDRGVSMFNMLEPKIFPYEMLMVTN                                      | 402 |
| Epitope (n=1) |  |     | -NSYGDVSGGVRDYQTLPDGHMPAMRMDRGVSMFNMLEPKIFPYEMLMVT-                                      |     |

Figure S9. **Immunodominant peptide epitopes on ABLIM1.** Phage-displayed library sequences (epitope sequences) that were immunoprecipitated by ILD patient plasma antibodies were aligned to ABLIM1 isoform a (NP\_002304) and isoform j (NP001309817). Number of patients that had reactivity to each epitope sequence is indicated on the figure. Highlighted region indicates the proline-rich region, which is commonly represented in a total of 12 phage-immunoprecipitated sequencing hits.
