# Supplementary material for: Antigenic responses are hallmarks of fibrotic interstitial lung diseases independent of underlying etiologies
Source: PubMed Central journal article supplement — medRxiv. 2023 May 11:2023.05.08.23289640. Preprint. [Version 1] doi: 10.1101/2023.05.08.23289640 (PMC10197719; doi:10.1101/2023.05.08.23289640), 2023-05-11
Supplement: media-2.pdf [file media-2.pdf]

**Table S1.**

Flow cytometry panel for T cells

| Immunogen      | Conjugate   | Clone     | Vendor                | Dilution |
|----------------|-------------|-----------|-----------------------|----------|
| PD1            | BV421       | MIH4      | BD                    | 25       |
| CD19           | BUV395      | HIB19     | BD                    | 100      |
| CD38           | eFluor450   | HIT2      | Invitrogen            | 100      |
| CD3            | BV480       | UCHT1     | BD                    | 100      |
| CD45RA         | BV510       | HI100     | Biolegend             | 400      |
| CD8            | BV570       | RPA-T8    | Biolegend             | 100      |
| Va7.2          | BV605       | 3C10      | Biolegend             | 50       |
| CD127          | BV750       | HIL-7R-M2 | BD                    | 100      |
| HLA-DR         | BV785       | L243      | Biolegend             | 200      |
| CD25           | BB515       | 2A3       | BD                    | 200      |
| CCR7           | AF488       | G043H7    | Biolegend             | 50       |
| ICOS           | PerCP-Cy5.5 | C398.4A   | Biolegend             | 200      |
| hu CD1d PBS-57 | PE          | -         | NIH tetramer facility | 200      |
| CD137          | PE-Cy5      | 4B4-1     | Biolegend             | 100      |
| Vd1            | PE-Cy7      | TS8.2     | Invitrogen            | 50       |
| Vd2            | PE-Cy7      | B6        | Biolegend             | 100      |
| CD4            | AF700       | OKT4      | Biolegend             | 200      |
| BCL6           | APC-Cy7     | K112-91   | BD                    | 2500     |
| RORgt          | BV650       | Q21-559   | BD                    | 50       |
| GATA3          | BV711       | L50-823   | BD                    | 200      |
| CD154          | APC         | 24-31     | Biolegend             | 50       |
| FOXP3          | AF647       | 206D      | Biolegend             | 50       |
| Zombie         | NIR         | -         | Biolegend             | 2500     |

**Table S2.**

Flow cytometry panel for B cells

| Immunogen | Conjugate    | Clone      | Vendor     | Dilution |
|-----------|--------------|------------|------------|----------|
| CD3       | PE-Cy5       | HIT3a      | BD         | 200      |
| HLA-DR    | APC-Fire 750 | L243       | Biolegend  | 333      |
| CD10      | BV711        | HI10a      | Biolegend  | 100      |
| CD14      | BUV395       | MΦP9       | BD         | 100      |
| CD16      | BV650        | 3G8        | Biolegend  | 333      |
| CD19      | PE-Cy7       | HIB19      | Biolegend  | 200      |
| CD20      | eFluor450    | 2H7        | Invitrogen | 100      |
| CD24      | BV510        | ML5        | Biolegend  | 200      |
| CD27      | APC-R700     | M-T271     | BD         | 100      |
| CD38      | APC          | HIT2       | Biolegend  | 100      |
| CD44      | AF488        | BJ18       | Biolegend  | 1000     |
| CD116     | BV421        | hGMCSFR-M1 | BD         | 333      |
| CD138     | PE-Dazzle    | MI15       | Biolegend  | 50       |
| IgD       | PerCP-Cy5.5  | IA6-2      | BD         | 100      |
| IgM       | BV785        | MHM-88     | Biolegend  | 333      |
| ILT3      | AF647        | ZM4.1      | Biolegend  | 333      |
| ILT5      | PE           | MKT5.1     | Biolegend  | 333      |
| CD71      | BUV805       | L01.1      | BD         | 100      |
| CXCR4     | BUV737       | 12G5       | BD         | 3333     |
| CD172     | BV750        | SE5A5      | BD         | 333      |
| CD11C     | BUV661       | B-ly6      | BD         | 333      |
| CD1C      | BV605        | F10/21A3   | BD         | 333      |
| CD26      | BV480        | L272       | BD         | 100      |
| Zombie    | NIR          | -          | Biolegend  | 2500     |
